1 **Article type** : Research Article

2

3

4 **Title: Horizontal orientation facilitates pollinator attraction and rain avoidance in**  
5 **radially symmetrical flowers**

6

7 Running head: Horizontal orientation in actinomorphic flowers

8

9 **Author details:**

10 Author names:

11 Taichi Nakata<sup>1\*</sup>, Ishii Rin<sup>2</sup>, Yuki A Yaida<sup>1</sup>, Atushi Ushimaru<sup>1,2\*</sup>

12

13 Author address:

14 <sup>1</sup>Graduate School of Human Development and Environment,

15 <sup>2</sup>Faculty of Human Development,

16 Kobe University, 3-1, 1Tsurukabuto, Kobe 657-8501, Japan

17 \*Correspondence authors who equally contributed to the work

18 Email: [t.nakata2307@gmail.com](mailto:t.nakata2307@gmail.com) (T. Nakata), [ushimaru@kobe-u.ac.jp](mailto:ushimaru@kobe-u.ac.jp) (A. Ushimaru)

19

20 **Abstract: 220 words, main text: 4532 words, 38 references, 5 figures, a supplementary**

21 **table, 6 supplementary figures**

22

23 **Abstract**

24 *Premise:* Floral angle, such as upward, horizontal, and downward orientation are known to  
25 evolve under both biotic and abiotic agents to enhance pollination success in zoophilous  
26 plants. Adaptive significance of horizontal orientation in radially symmetrical  
27 (actinomorphic) flowers under biotic and abiotic selection pressures were largely unknown,  
28 although those in bilaterally symmetrical flowers have been well studied.

29 *Methods:* Using experimentally angle changed flowers, we examined the effects of flower  
30 angle on pollinator behaviors, pollination success and rain avoidance in a population of  
31 insect-pollinated *Platycodon grandiflorus*. We further investigated the frequency and  
32 amount of precipitation in the flowering season and pollen damage by water in this species.

33 *Main results:* Horizontally oriented flowers received more visitations and pollen grains on  
34 the stigma in male and/or female phases than downward and/or upward oriented flowers  
35 and avoided pollen damage by rainfall compared to upward oriented flowers. The pollen  
36 germination experiment showed that approximately 30% of pollen grains burst in distilled  
37 water, thus pollen damage by rainfall was potentially serious in *P. grandiflorus*.

38 *Conclusion:* In this study, our field experiments revealed that upward flowers cannot avoid  
39 damage from rainfall during the flowering period whereas both upward and downward  
40 flowers suffered from pollinator limitation in female success. Thus, horizontal flower  
41 orientation is suggested to be adaptive in this insect-pollinated actinomorphic species which  
42 blooms in the rainy season.

43 **Keywords:** actinomorphy, floral orientation, rain drop, generalist pollination,

## 44 **Introduction**

45 Present floral diversity in angiosperms are considered to have evolved under selections  
46 mediated by both biotic and abiotic agents (Darwin, 1862; Grant and Grant, 1965; Stebbins,  
47 1970; Fenster et al., 2004; Wilmer, 2011). In animal-pollinated species, most floral traits  
48 such as size, shape, color, scent, flowering timing have adapted to enhance pollen transfer  
49 by their respective pollinators, while some of the traits simultaneously function as  
50 protection against harmful abiotic factors such as rain and very low/high temperature  
51 (Kudo, 1995; Huang et al., 2002; Patino et al., 2002). Flower angle (e.g. vertical direction  
52 of flower orientation including upward, horizontal, oblique and downward orientation)  
53 regulated by flower stalk angle is a trait which evolves under both biotic and abiotic agents  
54 to enhance pollination success in zoophilous plants (Hocking and Sharplin, 1965; Kevan,  
55 1975; Kudo, 1995; Tadey and Aizen, 2001; Huang et al., 2002; Patino et al., 2002; Galen  
56 and Stanton, 2003; Ushimaru et al., 2009; Haverkamp et al., 2019).

57 Flower angle is known to influence attraction to and behavioral control of specialized  
58 pollinators (Fenster et al., 2009; Ushimaru and Hyodo, 2005). Bilaterally symmetrical  
59 (zygomorphic) flowers usually exhibit horizontal orientation (Neal et al., 1998), which can  
60 attract more pollinators and enhance their legitimate behaviors for achieving higher pollen  
61 transfer success compared to upward or downward orientation (Ushimaru and Hyodo,  
62 2005; Ushimaru et al., 2009; Wang et al., 2014a). In contrast, the optimal flower angle may  
63 vary among radially symmetrical (actinomorphic) flowers likely depending on pollinator  
64 composition. For example, upward and heliotropic orientation increases floral temperature  
65 to attract many fly pollinators in alpine, arctic and early-spring blooming plants with dish-

66 shaped actinomorphic flowers (Hocking and Sharplin, 1965; Kevan, 1975; Kudo, 1995).  
67 Downward orientation of tubulous actinomorphic flowers likely limits pollinators to some  
68 specialized groups such as humming birds and large bees, improving pollination efficiency  
69 whereas upward-orientation facilitate nocturnal hawkmoth pollination in actinomorphic  
70 species (Fulton and Hodges, 1999; Aizen, 2003; Campbell et al., 2016).

71         Meanwhile, pollinators are unlikely the primary selective agent driving the evolution  
72 of floral angle but abiotic factors put more severe pressures in some zoophilous plants  
73 (Haung et al., 2002; Tadey and Aizen, 2001; Wang et al., 2010; Lin and Forrest, 2019).  
74 Downward flower orientation is thought to have evolved to avoid pollen damage and nectar  
75 dilution by rainfall and exposure to solar radiation in actinomorphic flowers (Huang et al.,  
76 2002; Tadey and Aizen, 2001; Wang et al., 2010; Lin and Forrest, 2019). In some generalist  
77 actinomorphic flowers which are pollinated by a wider range of pollinator groups (two or  
78 more functional groups), flower angle usually less influences pollinator composition and  
79 visit frequency, so that the effects of rainfall might be a more important driving force  
80 selecting downward orientation (Huang et al., 2002; Wang et al., 2010; Lin and Forrest,  
81 2019).

82         The adaptive significances of horizontal orientation in actinomorphic flowers under  
83 biotic and abiotic selection pressures have not been examined to date, although those in  
84 zygomorphic flowers are relatively well studied. Generally, specialized zygomorphic  
85 flowers exhibit higher pollination success when flowers face horizontally (Neal et al., 1998;  
86 Ushimaru et al., 2009; Wang et al., 2014a; Armbruster and Muchhala, 2020). So far only a  
87 single study examined the role of horizontal orientation in a generalist zygomorphic

88 species, in which horizontal oriented flowers achieved higher pollen transfer success than  
89 upward and downward orientated flowers (Yu et al., 2020). In the same species, horizontal  
90 flower orientation could reduce pollen damage by rainwater compared to upward orientated  
91 flowers, but the anthers were always wet during rainfall irrespective of flower angle (Yu et  
92 al., 2020). These together indicate that horizontal orientation have mainly evolved to attract  
93 and control pollinators in zygomorphic flowers. Meanwhile, to the best of our knowledge,  
94 functional roles of horizontal orientation in actinomorphic flowers with generalist systems  
95 were still unknown. We may expect that pollinator-mediated selection on flower angle  
96 would be less strong in generalist actinomorphic flowers.

97         Here, we report a case study on functional roles of horizontal orientation in  
98 attraction and landing control of pollinators, pollen transfer and rainfall avoidance in  
99 actinomorphic *Platycodon grandiflorus* whose flowers are visited by diverse insect groups  
100 in the rainy season. We conducted a flower angle-change experiment to examine the effects  
101 of flower angle on pollinator behaviors and pollination success. We also examined pollen  
102 viability in water and sucrose solutions and precipitation during the flowering season in the  
103 study site to investigate possibility of pollen damage by rainfall. Flowers of *P. grandiflorus*  
104 are protandrous and male and female phases do not overlap temporally within each flower.  
105 We therefore examined and discussed whether there were difference in the effects of flower  
106 angle between male and female phases in this study.

107

108

109

## 110 MATERIALS AND METHODS

### 111 Study species and site

112 The Japanese bellflower, *Platycodon grandiflorus* (Jacq.) A.DC. (Campanulaceae) is a  
113 perennial herb species, which is currently listed as Vulnerable species in the Natural Red  
114 list (Ministry of the Environment of Japan, 2020). This species usually grows on natural  
115 and semi-natural grasslands in Japan, Korean Peninsula, China and east Russia. In Japan,  
116 the species blooms during the rainy season from mid-June to mid-September. Blue cup-  
117 shaped insect-pollinated flowers, which are usually open for 4–6 d, are self-compatible and  
118 protandrous and require pollination for fruiting and seeding (Wei et al., 2006): male and  
119 female phases did not overlap and lasted average 1.3 d (1–3 d, n = 170) and 2.9 d (2–5 d, n  
120 =132), respectively (Fig. S1b, c). Both in male and female phases, flowers oriented nearly  
121 horizontally: flower angles deviated 2.4° in average (-43–32°, n = 32) from the horizontal  
122 direction (Fig. S2). In a male phase flower, the pistil produces pollen-bearing hairs, on  
123 which secondary pollen presentation occurs soon after flower opening whereas female  
124 phase starts with curling the stigmatic lobes like in other Campanulaceae species (Vranken  
125 et al., 2014) More than 80% of pollen grains have viability just after flower opening and  
126 pollen vigor quickly decreased to less than 30% three days later in cultivated plants (Wei et  
127 al., 2006). An individual of this species has thick roots and usually does not spread clonally.

128 We examined a population of *P. grandiflorus* in the Sugadaira plateau, Nagano  
129 Prefecture, Japan (36°32'12.9 N, 138°20'53.1 E) in August 2018–2019, 2021. The species  
130 is distributed only on ski slope grasslands which are managed by annual mowing in early  
131 September (Yaida et al., 2019). In the study site, we observed several pollinator groups

132 visiting *P. grandiflorus* flowers to forage pollen and nectar: large and medium sized bees  
133 (LM bees, mostly *Megachile* bees and more infrequently *Bombus* and *Apis* bees), small-  
134 sized bees (S bees, such as *Andrena* and Halictidae species), syrphid flies (*Episyrphus*  
135 *balteatus*, *Syrphus torvus* and other syrphid flies), infrequently scolid wasps and butterflies  
136 and skippers (e.g., *Ochlodes ochraceus*) and beetles (Fig. S3).

137

### 138 **Flower diameter change during opening**

139 We measured flower diameters of en face surface at male (ca. 0.5-1d after opening) and  
140 female phases (over 3 d after opening) by a digital caliper (in mm) to examine the effects of  
141 temporal change in petal lobe opening on pollinator attraction and rainfall avoidance.

142

### 143 **Effects of floral angle on pollinator behaviors**

144 We experimentally prepared three types of flowers that differed in terms of their floral  
145 angle in 2018:

146 (1) Con: control flowers whose angle were not changed,

147 (2) Up: flowers whose faces were turned upright and

148 (3) Down: flowers whose faces were turned downward.

149 Angles of all experimental flowers were fixed by short wires during the anthesis (Fig. 1).

150 The same treatment was done for all opening flowers within the same individual: totally

151 413 (143 Con, 139 Up and 131 Down) flowers on 84 (31 Con, 28 Up and 25 Down)

152 individuals: four flowers on the same plant were examined at the maximum. The number of

153 opening flowers for each individual varied 1 to 3 and the average was 1.4 in the site. All the

154 experimental individuals and their flowers were marked and identified.

155           To test the effects of floral angle on pollinator behaviors, we observed pollinator  
156 visits to experimental flowers. For each trial, we arbitrarily selected neighboring 3–10  
157 experimental individuals including more than one flower types and observed pollinators to  
158 them for 20-min observation. We conducted totally 41 observation trials (820 min  
159 observation in total) during the daytime from 08:00 to 15:00 h on sunny days when  
160 pollinators were active. Before each trial, we recorded sexual phase (male or female) of  
161 each experimental flower. Most flowers were repeatedly observed in different timings  
162 during the same sexual phase in the same day and/or on different dates and at different  
163 sexual phases: the average number of observation times per flower was 3.36 (1–8) and 16  
164 flowers were observed only once. Twenty-five and 56 flowers were observed in either male  
165 or female phase, respectively whereas 42 flowers were observed in both male and female  
166 phases. In all trials, we observed cumulatively 95 male Con, 87 male Up, 97 male Down,  
167 48 female Con, 52 female Up and 34 female Down flowers.

168           During our observation, we recorded two types of pollinator behavior: approach  
169 and landing behaviors. Approach occurred when pollinators found a flower and approached  
170 it from the front. Landing was defined as a pollinator landing on any part of a flower after  
171 approaching it. We further divided landings into the following two types (Ushimaru and  
172 Hyodo, 2005): legitimate landing, a pollinator touched any parts of the pistil and stamens  
173 during its landing; petal landing, a pollinator landed on any part of petals and foraged or  
174 collected pollen without touching secondary presented pollen on the pistil or the stigma  
175 lobes. We counted the number of each behavior on each experimental flower for each



176 observation trial.

177

### 178 **Effects of floral angle on pollen transfer success**

179 We estimated pollen removal by counting the number of pollen grains remaining on the  
180 pistil hairs of 60 experimental flowers and that on each of newly opened, unvisited ten  
181 flowers in 2019 (c.f.; Harder 1990; Ushimaru et al. 2006; Ushimaru et al. 2014; Katsuhara  
182 et al. 2017; Ushimaru et al. 2021). We collected a single pistil from each of naturally-  
183 pollinated 20 Con, 20 Up and 20 Down flowers (60 individuals) whose male phases were  
184 almost finished by carefully checking the pistil conditions, such as stigmatic lobes status,  
185 and stored separately. The pistil with secondary pollen presentation were collected from  
186 each of ten unvisited flowers after their opening and was stored in 1.0 mL 99.9 % ethanol  
187 as a single sample. We vortexed the sample well and estimated the number of pollen grains  
188 per sample by counting the pollen numbers in three 10.0  $\mu$ L drops per sample under a  
189 microscope. To quantify pollen removal from each experimental flower we calculated  
190 pollen removal [(the mean estimated number of pollen grains in the newly opened flowers)  
191 - (the estimated number of pollen grains remaining in each experimental flower)] as an  
192 integer (Ushimaru et al., 2014; Ushimaru et al., 2021).

193 We also examined the effects of floral angle on pollen receipt by collecting the  
194 pistil of a single flower from each of 20 Con, 20 Up and 20 Down individuals ca. 3 d after  
195 the start of female phases in early August, 2019. These flowers were exposed to natural  
196 pollinator visits from bud break for ca. 5 d. We dissected the stigma from a remaining part  
197 of each pistil and stored it separately. We then counted the number of pollen grains

198 deposited on the stigma for each sampled flower under a microscope ( $\times 40$ ) in the  
199 laboratory.

200

### 201 **Experimental flowers in the rain and precipitation during the flowering season**

202 In 2019, though it was not quantitatively, we observed several male-phase and female-  
203 phase experimental and intact flowers after rainfall to examine whether mating related parts  
204 (anthers, pistil hairs and stigma) were wetted, soaked or not.

205           Additionally, to examine the effect of flower angle on rain susceptibility, 61  
206 experimental flowers (10 male Con, 10 male Up, 10 male Down, 11 female Con, 10 female  
207 Up, 10 female Down) were prepared and observed whether flower base, mating related  
208 organs and pollen of these flowers were wet or soaked 24-h after rain in 16 August, 2021.

209           We obtained meteorological data during the last decade (2010–2019) from the  
210 nearest AMEDAS (governmental weather observation system in Japan; 36°31'9 N,  
211 138°19'5 E) station to examine precipitation (mm per day) during the flowering season (15  
212 July–15 September) of *P. grandiflorus* in the study site.

213

### 214 **Pollen germination in water and sucrose solution**

215 To test how rainfall influence viability of pollen grains, we examined pollen germination  
216 and burst in water or sucrose solutions according to the existing method (Dafni, 1992;  
217 Huang et al., 2002). We collected pollen grains from 10 flowers just after opening and  
218 preserved at ca.  $-20\text{ }^{\circ}\text{C}$  in a freezer in our laboratory. We then placed pollen grains from  
219 dehisced anthers of a single flower on slide glasses with 0, 5, 10, 15, and 20 % (g/g  $\times 100$ )

220 sucrose solutions: the 0% solution is just distilled water. For each glass, we examined the  
221 fates of 45–235 (average 145.7) pollen grains and counted the number of germinated and  
222 burst pollen grains after 24 h under a light microscope. This germination/burst test was  
223 repeated ten times for each sucrose concentration.

224

## 225 **Analyses**

226 We first compared en face flower diameter between sexual phases using a generalized  
227 linear mixed model (GLMM, gaussian errors and identity link function) in which the  
228 diameter of each flower, sexual phase (male/female) and individual identities were the  
229 response and explanatory variables and the random terms, respectively. We then examined  
230 the effect of angle changes on pollinator behaviors using GLMMs with Poisson errors and  
231 logarithmic link function. The number of approaches, legitimate landings or petal landings  
232 per 20 min. per flower was the response variable. In all the models, we included treatment  
233 (Con/Up/Down), sexual phase and their interaction as the explanatory variables, display  
234 size (the number of flowers per individual) and observation time (start time, minutes from  
235 08:00) as covariates and the individual identity as a random term. We also conducted the  
236 same GLMM analyses for the two behavior of three major pollinator groups, separately.  
237 Secondly, we compared pollen removal and receipt between Con and other (Up and Down)  
238 flowers using generalized linear models (GLMs with negative binomial errors and  
239 logarithmic link). The model incorporated treatment as the explanatory variable and pollen  
240 removal or pollen receipt was the response variable. Thirdly, we examined difference in the  
241 ratio of flowers whose flower base or mating related organs among experimental flowers

242 using a Fisher's exact test. We finally compared the ratios of germinated and burst pollen  
243 grains (burst or germination) on using GLMMs (negative binomial error and logarithmic  
244 link), in which each pollen number, the sucrose concentration category (0/5/10/15/20), and  
245 total number of examined pollen grains were the response and explanatory variables, an  
246 offset term, and individual identity as a random term respectively. All statistical analyses  
247 were done using the software R (R Development Core Team 2015).

248

## 249 **RESULTS**

### 250 **Flower diameter change**

251 We found a significant increase in en face flower diameter from male (mean  $\pm$  SE, range;  
252  $5.0 \pm 0.24$  cm, 2.0–5.1 cm) to female ( $5.8 \pm 0.49$  cm, 2.0–7.3 cm) phases (Table S1),  
253 indicating that petal lobes opened more and often bent backward in the female phase of  
254 each flower. Note that the whole style was under the umbrella of upper petal lobe during  
255 the male phase in the horizontally orientated flowers (Fig. 1a).

256

### 257 **Effects of floral angle on pollinator behaviors**

258 Most dominant pollinators to experimental flowers were LM bees (227 approaches, 56.7 %  
259 of total approaches) and S bees (100 approaches, 24.9 %) and syrphid flies (74 approaches,  
260 18.5 %) followed. It should be noted that the ratios of the three major pollinator groups did  
261 not differ significantly among flower types and between sexual phases for legitimate  
262 landings (Fig. S4b).

263 Approach frequency per flower by all pollinators did not differ significantly

264 between Con and other flower types whereas approaches to male-phase flowers were  
265 significantly higher than those to female-phase flowers in all the flower types (Fig. 2a,  
266 Table S1). Approaches per flower by all pollinators significantly decreased with increasing  
267 display size (Table S1). Significant decreases in approach at female phase and with larger  
268 display size were found in LM and S bees, respectively. Approaches significantly increased  
269 with observation time in all pollinators and bee groups (Table S1).

270 Legitimate landings by all pollinators and bees were significantly fewer on Down  
271 flowers than on controls whereas the variable did not differ between Con and Up flowers  
272 (Fig. 2b, Table S1). The response variable for all pollinators and LM bees was significantly  
273 lower in female phase flowers than in male-phase flowers (Fig. 2b, Table S1). Legitimate  
274 landings increased with observation time in all pollinators and bees whereas the variable  
275 decreased with increasing display size only in S bees (Table S1).

276 Petal landings by all pollinators and each pollinator group was not influenced by  
277 any explanatory variables at all (Table S1). The interaction between flower angle and  
278 sexual phase had no significant effects on any response variables in any pollinator groups  
279 except for approaches by S bees, such that the variable significantly increased in female-  
280 phase Up flowers than male-phase controls (Table S1).

281

## 282 **Effects of floral angle on pollen transfer success**

283 More than 95 percent of pollen grain were removed from pistil hairs in all the flower types  
284 and significant higher pollen removal was found in Up and Down flowers than in controls  
285 (Fig. 3a, Table S1). By contrast, the stigmas of Up and Down flowers received significantly

286 fewer pollen grains (ca. 45 and 30 grains in average, respectively) than those of Con  
287 flowers which received more than 65 pollen grains in average (Fig. 3b, Table S1).

288

### 289 **Flowers in rainy conditions and precipitation during the flowering season**

290 When over 3.5 mm precipitation per day was observed, Up flowers accumulated rainfall  
291 and the anthers and pistil hairs therein were soaked in the male phase whereas some parts of  
292 the stigma lobes of Up flowers were wet or soaked in the female phase in 2019 (Fig. S5a,  
293 b). In Down flowers, mating related parts were never wet or soaked, although the back of  
294 petals were wet. The back of upper petals and the front of lower petal lobes were wet in  
295 Con and intact flowers, but the mating-related organs were rarely wet: stigma surfaces were  
296 very infrequently wet in female-phase flowers with very opened petal lobes.

297         The flower base was soaked or wet after 6.0 mm rain in many Up flowers in 16  
298 August, 2021, although not much water remained in flower cups owing to stem oscillation  
299 by the strong wind. We observed a single case in which the pistil of Up flower was broken  
300 by the rain (Fig. S5c). The number of flowers whose pollen, flower base and/or mating  
301 related organs were soaked or wet was significantly greater in Up flowers than in other  
302 flower types (Fig.4a). In Con and Down flowers, lobes and backs of the petals were often  
303 wet but mating related organs were never wet in the experiment (Fig. 4b).

304         In the last decade,  $\geq 3.5$ mm precipitations, which was enough to soak most part of  
305 the pistil in Up flowers, were found for 10–21 (mean, 16.6) d during the flowering period  
306 (Fig. S6). Moreover, heavy rain over 10 mm per hour were often observed in the study area.  
307 More than 4.2 sequential days (the average longevity of a flower) without rainfall were

308 observed less than half of the flowering season in 2010–2019, indicating that the majority  
309 of flowers experienced rainfall to some extent during their opening in the study area (Fig.  
310 S6). The number of periods when more than 5 sequential days without rain were only 3  
311 times and once in 2018 and 2019, respectively in the study areas during the flowering  
312 period (Fig. S6).

313

#### 314 **Pollen germination in water and sucrose solution**

315 On average, 56.3 % of pollen grains germinated in the 5–20 % sucrose solution whereas  
316 only 0.04 % of grains germinated in distilled water (Fig. 5). The differences between  
317 distilled water and sucrose solutions were significant (Table S1). Approximately 30 % of  
318 pollen grains burst in distilled water. By contrast, only less than 0.007 % of pollen grains  
319 burst in 5–20 % sucrose solutions and the percentages were significantly lower than that in  
320 distilled water: especially no pollen burst was observed in 20 % sucrose solutions.

321

#### 322 **DISCUSSION**

323 In this study, we examined functional roles of horizontal flower orientation with respect to  
324 pollinator behavior control and rain protection in actinomorphic *P. grandiflorus*. Our field  
325 experiments showed that upward oriented flowers likely suffered more from pollen and  
326 pistil damages by rainfall and pollen limitation than controls whereas downward oriented  
327 flowers received less visitations and pollen grains on the stigmas compared to control  
328 flowers. Thus, horizontal flower orientation might have evolved under both pollinator- and  
329 rain-mediated selections in actinomorphic *P. grandiflorus* flowers. We discussed our

330 findings more in detail below.

331

### 332 **Effects of floral angle on pollinator behaviors and pollen transfer**

333 Although all flower types experienced a similar number of approaches by all pollinator  
334 groups, downward flower orientation reduced legitimate landings of bees when comparing  
335 to horizontal and upward orientation in both male and female phases unlike our  
336 expectation. Thus, floral orientation influenced pollinator landing behavior rather than  
337 pollinator attraction. The results are concordant with the findings in zygomorphic  
338 *Commelina communis* (Ushimaru and Hyodo 2005), but not with patterns in another  
339 zygomorphic species, *Corydalis sheareri* whose upward-oriented flowers also had  
340 pollinator limitation (Wang et al., 2014a) as well as in actinomorphic flowers of *Pulsatilla*  
341 *cernua* (Haung et al., 2002), *Geranium refractum* (Wang et al. 2014b) and *Mertensia*  
342 species (Lin et al., 2019) whose downward-oriented flowers did not suffer from pollinator  
343 limitation. The discrepancies between the present and previous studies (Wang et al., 2014a,  
344 b; Lin et al., 2019) might be owing to differences in pollination system, i.e., a set of floral  
345 characteristics and pollinators. Bumble bees usually less discriminate downward flowers  
346 with open or cup shapes but leafcutter and small-sized bees, syrphid flies and lepidopterans  
347 do when approaching and/or landing (Haung et al., 2002; Ushimaru and Hyodo 2005; Wang  
348 et al., 2014a, b; Lin et al., 2019; Yu et al., 2020). Moreover, long-tubed flowers were often  
349 not preferred by diurnal pollinators when facing upright experimentally (Wang et al.,  
350 2014a; Yu et al., 2020) whereas upright open or cup-shaped flowers were visited by various  
351 groups of pollinators who usually used petals as landing platforms (Huang et al., 2002;



352 Ushimaru and Hyodo 2005; Wang et al. 2014b; Lin et al., 2019). Leafcutter bees, small-  
353 sized bees and syrphid flies (the dominant pollinators in *P. grandiflorus*) were sometimes  
354 observed to take longer time to find footholds on Down flowers than on other flower types,  
355 although we did not quantify the time. The longer handling time might cause discrimination  
356 of Down flowers by these pollinators.

357         Pollen removal per flower was significantly enhanced by upward and downward  
358 flower orientations compared to horizontal one. Though the difference was not significant,  
359 upright flowers experienced more legitimate landings than controls in the male phase, being  
360 consistent with the pollen removal result. Meanwhile, pollinator-limited downward flowers  
361 had higher pollen removal than controls did as well. We cannot explain this with our data  
362 set, but accidental pollen loss owing to shaking flowers by pollinators and wind could be  
363 responsible. Anyway, over 95 % of pollen grains were removed from all flower types, so  
364 the difference in pollen removal was small (Fig. 3).

365         By contrast, flower angle change treatments largely reduced pollen receipt on the  
366 stigma in *P. grandiflorus* like in the previous studies on horizontally-oriented zygomorphic  
367 flowers (Ushimaru et al., 2009; Wang et al., 2014a). Pollinator limitation might cause lower  
368 pollen receipt in downward flowers. Upward flowers received lower numbers of visits than  
369 control flowers in the female phase though not significant (Fig. 2a), likely causing lower  
370 pollen receipt. However, further clarification why upward flowers had lower female  
371 pollination success would be required in future.

372         Sexual phase, display size and time in the day influenced pollinator visitation to *P.*  
373 *grandiflorus* flowers. Female-phase flowers received significantly less approaches and

374 landings by larger-sized bees than male phase flowers, suggesting that these bees foraged  
375 mainly pollen on flowers. Larger display sizes tended to decrease pollinator attraction per  
376 flower, indicating that relatively large corolla of each flower enough attract pollinators and  
377 that simultaneous opening of multiple flowers within an individual might be rather negative  
378 for reproductive success of individual flowers. This may explain relatively small average  
379 display size (1.3 flowers per plant) of this species. Bees increased their visitations to  
380 flowers toward noon and afternoon but no such a pattern was observed for syrphid flies.  
381 Daily active patterns are known to vary between bees and flies (Herrera, 1990; Rader et al.,  
382 2013; Ushimaru et al., 2021). However, to elucidate factors explaining the difference, more  
383 information on thermoregulatory ability, energy requirements and their interactions with  
384 habitat environments for each group (or species) were needed (Herrera, 1990; Rader et al.,  
385 2013)

386

### 387 **Role of horizontal flower orientation in rain avoidance**

388 It is well known that pendant and downward flowers have a function to protect pollen  
389 grains from rainfall and sun radiation (Tadey and Aizen, 2001; Haung et al., 2002;  
390 Haverkamp et al., 2019). In *P. grandiflorus*, many pollen grains burst and lost the  
391 germination ability in water, indicating a significant negative effect of rainfall on the pollen  
392 viability like in the other species (Tadey and Aizen, 2001; Huang et al., 2002; Mao and  
393 Haung, 2009). The anthers, pistil hairs and stigma of control flowers were observed not to  
394 be wet and soaked as in experimental downward flowers (Fig. 4, S5d, e, f, g). Interestingly,  
395 in the male phase, petal lobes did not fully open compared to those in the female phase,

396 suggesting their function as an umbrella for pollen grains during the rain events. We  
397 frequently observed intact flowers facing toward down-slope irrespective of slope direction  
398 like in forest-floor flowers on the slopes (Ushimaru et al. 2006) and often opened toward  
399 the sun direction in the study site, indicating no sun radiation preference and avoidance in  
400 the species (A. Ushimaru, personal observation). Flowering phenology of *P. grandiflorus*  
401 just overlaps rainy and typhoon seasons in Japan. Thus, horizontal orientation should have  
402 rainfall avoidance function in their flowers.

403

#### 404 **Conclusion**

405 In this study, our field experiment revealed that upward flowers cannot avoid damage from  
406 rainfall during the flowering period whereas downward flowers suffered from pollinator  
407 limitation in *P. grandiflorus*. Thus, horizontal flower orientation is suggested to evolve  
408 under both biotic and abiotic agents in this species. The very recent study suggested a  
409 similar adaptation in horizontally-orientated zygomorphic *Abelia* × *grandiflora* flowers (Yu  
410 et al., 2020). However, in the species, the role of horizontal orientation in rain protection is  
411 dubious because the anthers and stigmas are protuberant from the petals and always wet  
412 under rainy conditions (Yu et al., 2020). Thus, our results firstly demonstrated that  
413 horizontal orientation enhanced pollinator legitimate landings and female pollination  
414 success as well as protect mating-related organs, especially the anthers and secondary  
415 presented pollen grains in the male phase from rainfall damage in actinomorphic *P.*  
416 *grandiflorus* flowers. Because the adaptive significances of horizontal flower orientation in  
417 actinomorphic flowers with generalist pollination systems were examined only in this

418 species, more other species should be investigated to generalize our findings.

419

## 420 **ACKNOWLEDGEMENTS**

421 We thank Gaku Hirayama, Fuma Kawakami, Akinari Sato, and Airi Asada for their help in  
422 field works and Koki R. Katsuhara for his suggestions on statistical analyses. We are  
423 grateful to the Sugadaira-kogen Hare snow resort for allowing our fieldworks. This  
424 research results were aided by a research fund (no. R1-3-17) to TN from Nagano Society  
425 for the promotion of science and a Grant-in-Aid for Scientific Research Programs  
426 (KAKENHI no. 19H03303) to AU from the Japan Society for the Promotion of Science.

427

## 428 **AUTHOR CONTRIBUTIONS**

429 AU and RI firstly conceived the study and designed the methodology; TN, RI, YAY and  
430 AU collected the data; TN and AU analyzed the data and were involved in the writing of  
431 the manuscript. All authors contributed critically to the drafts and provided final approval  
432 for publication.

433

## 434 **References**

- 435 Aizen, M. A. 2003. Influences of animal pollination and seed dispersal on winter flowering  
436 in a temperate mistletoe. *Ecology* 84: 2613–2627.
- 437 Armbruster, W. S., and N. Muchhala. 2020. Floral reorientation: the restoration of  
438 pollination accuracy after accidents. *New Phytologist* 227: 232–243.
- 439 Campbell, D.R., A. Jürgens, and S. D. Johnson. 2016. Reproductive isolation between

- 440 *Zaluzianskya* species: the influence of volatiles and flower orientation on hawkmoth  
441 foraging choices. *New Phytologist*, 210, 333–342.
- 442 Dafni, A. 1992. *Pollination ecology: a practical approach*. Oxford University Press, Oxford,  
443 UK.
- 444 Darwin, C. 1862. On the Two Forms, or Dimorphic Condition, in the Species of *Primula*,  
445 and on their remarkable Sexual Relations. *Botanical Journal of the Linnean Society*  
446 6: 77–96.
- 447 Fenster, C. B., W. S. Armbruster, P. Wilson, M. R. Dudash, and J. D. Thomson. 2004.  
448 Pollination Syndromes and Floral Specialization. *Annual Review of Ecology,*  
449 *Evolution, and Systematics* 35: 375–403.
- 450 Fenster, C. B., W. S. Armbruster, and M. R. Dudash. 2009. Specialization of Flowers: Is  
451 Floral Orientation an Overlooked First Step? *The New Phytologist* 183: 502–506.
- 452 Fulton, M., and S. A. Hodges. 1999. Floral isolation between *Aquilegia formosa* and  
453 *Aquilegia pubescens*. *Proceedings of the Royal Society of London. Series B:*  
454 *Biological Sciences* 266: 2247–2252.
- 455 Galen, C., and M. L. Stanton. 2003. Sunny-side up: flower heliotropism as a source of  
456 parental environmental effects on pollen quality and performance in the snow  
457 buttercup, *Ranunculus adoneus* (Ranunculaceae). *American Journal of Botany* 90:  
458 724–729.
- 459 Grant, V., and K. A. Grant. 1965. *Flower pollination in the phlox family*.  
460 Columbia University Press, New York, New York, USA.
- 461 Harder, L. D. 1990. *Pollen Removal by Bumble Bees and Its Implications for Pollen*

- 462 Dispersal. *Ecology* 71: 1110–1125.
- 463 Haverkamp, A., X. Li, B. S. Hansson, I. T. Baldwin, M. Knaden, and F. Yon. 2019. Flower  
464 movement balances pollinator needs and pollen protection. *Ecology* 100: e02553.
- 465 Hocking, B., and C. D. Sharplin. 1965. Flower Basking by Arctic Insects. *Nature* 206: 215.
- 466 Herrera, C. M. 1990. Daily Patterns of Pollinator Activity, Differential Pollinating  
467 Effectiveness, and Floral Resource Availability, in a Summer-Flowering  
468 Mediterranean Shrub. *Oikos* 58: 277–288.
- 469 Huang, S.-Q., Y. Takahashi, and A. Dafni. 2002. Why does the flower stalk of *Pulsatilla*  
470 *cernua* (Ranunculaceae) bend during anthesis? *American Journal of Botany* 89:  
471 1599–1603.
- 472 Katsuhara, K. R., S. Kitamura, and A. Ushimaru. 2017. Functional significance of petals as  
473 landing sites in fungus-gnat pollinated flowers of *Mitella pauciflora* (Saxifragaceae).  
474 *Functional Ecology* 31: 1193–1200.
- 475 Kevan, P. G. 1975. Sun-Tracking Solar Furnaces in High Arctic Flowers: Significance for  
476 Pollination and Insects. *Science* 189: 723–726.
- 477 Kudo, G. 1995. Ecological Significance of Flower Heliotropism in the Spring Ephemeral  
478 *Adonis ramosa* (Ranunculaceae). *Oikos* 72: 14–20.
- 479 Lin, S.-Y., and J. R. K. Forrest. 2019. The function of floral orientation in bluebells:  
480 interactions with pollinators and rain in two species of *Mertensia* (Boraginaceae).  
481 *Journal of Plant Ecology* 12: 113–123.
- 482 Mao, Y.-Y., and S.-Q. Huang. 2009. Pollen resistance to water in 80 angiosperm species:  
483 flower structures protect rain-susceptible pollen. *New Phytologist* 183: 892–899.

- 484 Neal, P. R., A. Dafni, and M. Giurfa. 1998. Floral symmetry and its role in plant-pollinator  
485 systems: Terminology, Distribution, and Hypotheses. *Annual Review of Ecology and*  
486 *Systematics* 29: 345–373.
- 487 Patiño, S., C. Jeffree, and J. Grace. 2002. The ecological role of orientation in tropical  
488 convolvulaceous flowers. *Oecologia* 130: 373–379.
- 489 Rader, R., W. Edwards, D. A. Westcott, S. A. Cunningham, and B. G. Howlett. 2013.  
490 Diurnal effectiveness of pollination by bees and flies in agricultural *Brassica rapa*:  
491 Implications for ecosystem resilience. *Basic and Applied Ecology* 14: 20–27.
- 492 R Development Core Team. 2015. R: A Language and Environment for Statistical  
493 Computing. R Foundation for Statistical Computing, Vienna.
- 494 Stebbins, G. L. 1970. Adaptive Radiation of Reproductive Characteristics in Angiosperms,  
495 I: Pollination Mechanisms. *Annual Review of Ecology and Systematics* 1: 307–326.
- 496 Tadey, M., and M. A. Aizen. 2001. Why do flowers of a hummingbird-pollinated mistletoe  
497 face down? *Functional Ecology* 15: 782–790.
- 498 Ushimaru, A., and F. Hyodo. 2005. Why do bilaterally symmetrical flowers orient  
499 vertically? Flower orientation influences pollinator landing behaviour. *Evolutionary*  
500 *Ecology Research* 7: 151–160.
- 501 Ushimaru, A., D. Kawase, and A. Imamura. 2006. Flowers adaptively face down-slope in  
502 10 forest-floor herbs. *Functional Ecology* 20: 585–591.
- 503 Ushimaru, A., I. Dohzono, Y. Takami, and F. Hyodo. 2009. Flower orientation enhances  
504 pollen transfer in bilaterally symmetrical flowers. *Oecologia* 160: 667–674.
- 505 Ushimaru, A., A. Kobayashi, and I. Dohzono. 2014. Does Urbanization Promote Floral

- 506 Diversification? Implications from Changes in Herkogamy with Pollinator  
507 Availability in an Urban-Rural Area. *The American Naturalist* 184: 258–267.
- 508 Ushimaru, A., I. Rin, and K. R. Katsuhara. 2021. Covering and shading by neighbouring  
509 plants diminish pollinator visits to and reproductive success of a forest edge-  
510 specialist dwarf species. *Plant Biology* 23: 711–718.
- 511 Vranken, S., R. Brys, M. Hoffmann, and H. Jacquemyn. 2014. Secondary pollen  
512 presentation and the temporal dynamics of stylar hair retraction and style elongation  
513 in *Campanula trachelium* (Campanulaceae). *Plant Biology* 16: 669–676.
- 514 Wang, H., S. Tie, D. Yu, Y.-H. Guo, and C.-F. Yang. 2014a. Change of Floral Orientation  
515 within an Inflorescence Affects Pollinator Behavior and Pollination Efficiency in a  
516 Bee-Pollinated Plant, *Corydalis shearerii*. *PLOS ONE* 9: e95381.
- 517 Wang, H., C.-L. Xiao, R. W. Gituru, Z. Xiong, D. Yu, Y.-H. Guo, and C.-F. Yang. 2014b.  
518 Change of floral orientation affects pollinator diversity and their relative importance  
519 in an alpine plant with generalized pollination system, *Geranium refractum*  
520 (Geraniaceae). *Plant Ecology* 215: 1211–1219.
- 521 Wang, Y., L.-H. Meng, Y.-P. Yang, and Y.-W. Duan. 2010. Change in floral orientation in  
522 *Anisodus luridus* (Solanaceae) protects pollen grains and facilitates development of  
523 fertilized ovules. *American Journal of Botany* 97: 1618–1624.
- 524 Wei J, Huang L, Chen S, Cheng H, Yang C, Chu Q. 2006 Study on the stigma/pollen vigor  
525 and self-compatibility of *Platycodon grandiflorum*. *China Journal of Chinese Materia*  
526 *Medica* 31, 366–8.
- 527 Willmer, P. 2011. *Pollination and Floral Ecology*. Princeton University Press.



- 528 Yaida, A. Y., T. Nagai, K. Oguro, K. Katsuhara, K. Uchida, T. Kenta, and A. Ushimaru.  
529 2019. Ski runs as an alternative habitat for threatened grassland plant species in  
530 Japan. *Palaearctic Grasslands*. 42: 16–22.
- 531 Yu, Y.-M., X.-X. Li, D. Xie, and H. Wang. 2020. Horizontal orientation of zygomorphic  
532 flowers: significance for rain protection and pollen transfer. *Plant Biology*. 23: 156-  
533 161
- 534



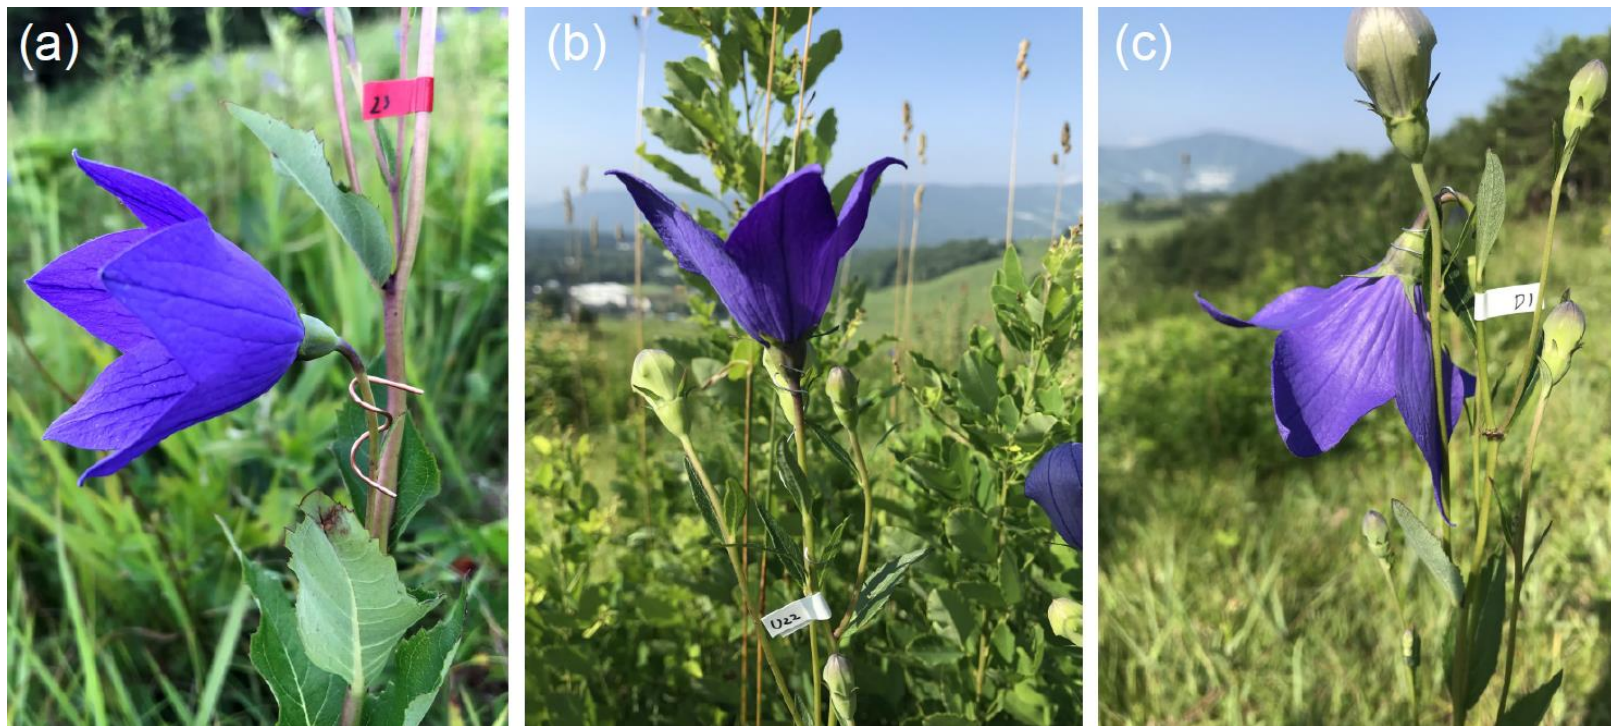

**FIGURE 1** Photos of experimental flowers of *Platycodon grandiflorus*: control (Con, a), upward-facing (Up, b), and downward-facing (Down, c) flowers. Main floral axes of Con and manipulated (Up and Down) flowers were prepared nearly horizontal and vertical, respectively.

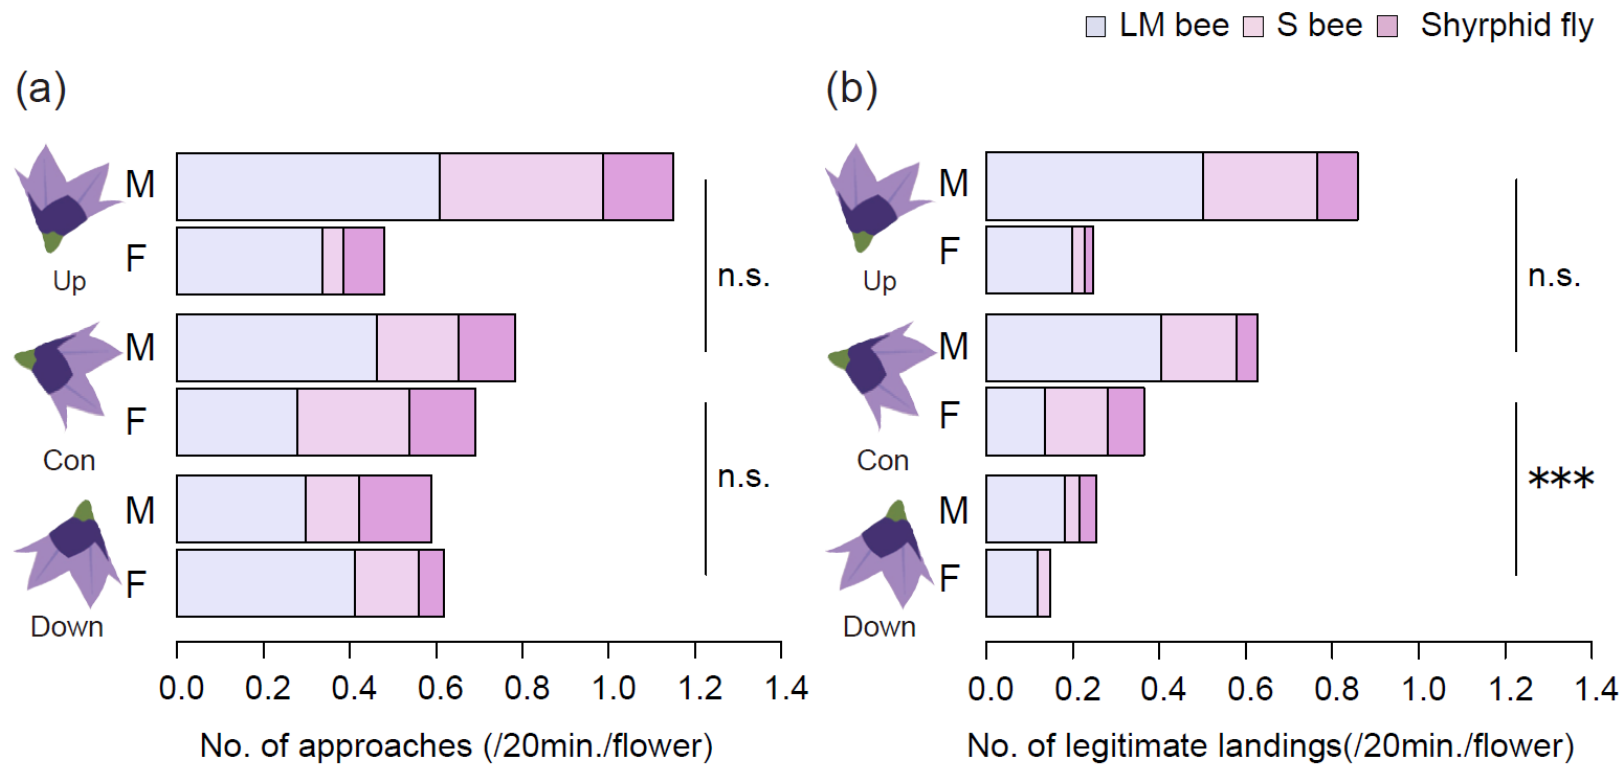

**FIGURE 2** Mean numbers of approaches (a) and legitimate landings (b) by pollinators per 20 min per flower for the experimental (Con, Up, and Down) flowers of *Platycodon grandiflorus*. M and F show each sexual phase (M: male phase; F: female phase). \*\*\*,  $P < 0.001$ ; n.s.,  $P > 0.1$ , by GLMM.

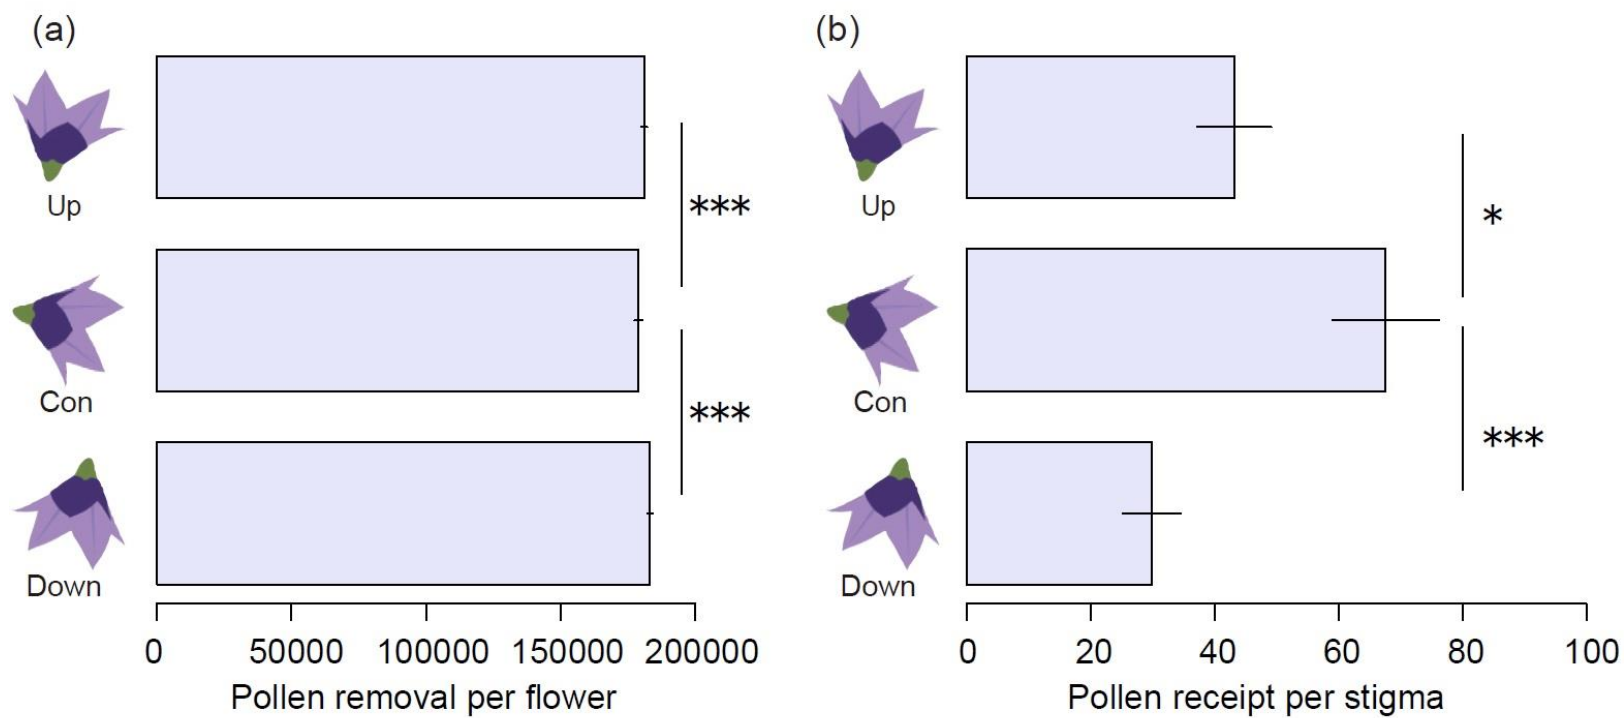

**FIGURE 3** Mean number of remaining pollen grains on the pistil hairs (a) and deposited on the stigma (b) for the experimental (Con, Up, and Down) flowers. Bars show standard errors. \*\*\*,  $P < 0.001$ ; \*,  $P < 0.05$  by GLM.

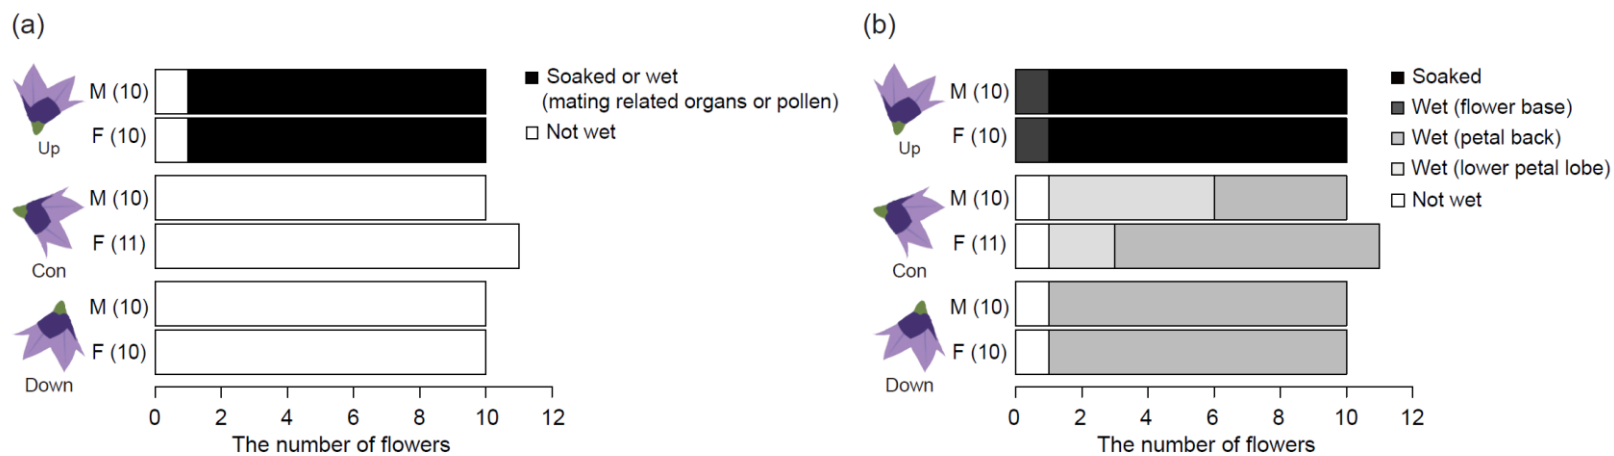

**FIGURE 4.** The effect of flower angle on rain susceptibility in experimental *Platycodon grandifloras* flowers. The ratios of flowers whose flower base (a) and mating related organs or pollen (b) were soaked or wet after ca. 6.0 mm rainfall differed significantly among flower types (a, b; Fisher's exact test,  $p < 0.001$ ).

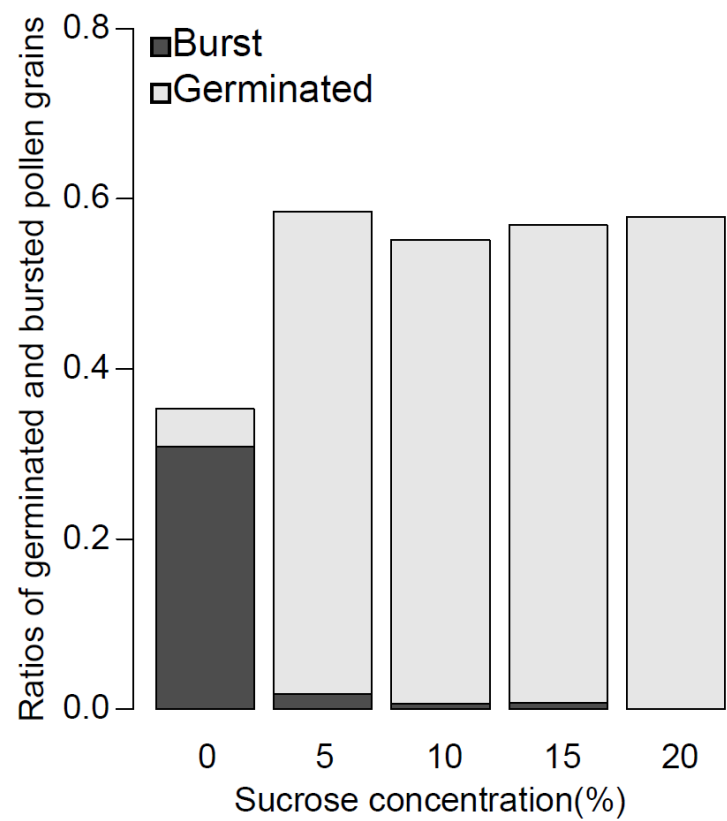

**FIGURE 5** Ratios of germinated and burst pollen grains of *Platycodon grandifloras* in sucrose solution with various concentrations.
